# Supplementary material
Source: PubMed Central journal article supplement (PMC6151448)
Supplement: MD-009-C8MD00270C-s001.pdf [file MD-009-C8MD00270C-s001.pdf]

## Supplementary Information

### Synthesis of novel Perillyl-Dihydropyrimidinone Hybrids designed for antiproliferative activity.

Vinicius Vendrusculo,<sup>a</sup> Vanessa P. de Souza,<sup>a</sup> Luiz Antônio M. Fontoura,<sup>b,c</sup> Marcelo G. M. D'Oca,<sup>d</sup> Thais P. Banzato,<sup>e,f</sup> Paula A. Monteiro,<sup>e,f</sup> Ronaldo A. Pilli,<sup>g</sup> João Ernesto de Carvalho,<sup>e,f\*</sup> and Dennis Russowsky<sup>a\*</sup>

<sup>a</sup> Instituto de Química, Universidade Federal do Rio Grande do Sul, Porto Alegre, RS, Brazil.

<sup>b</sup> Fundação da Ciência e Tecnologia do Estado do Rio Grande do Sul, Porto Alegre, RS, Brazil.

<sup>c</sup> PPGEMPS, Universidade Luterana do Brasil, Canoas, RS, Brazil

<sup>d</sup> Escola de Química e Alimentos, Universidade Federal do Rio Grande, Rio Grande, RS, Brazil.

<sup>e</sup> Instituto de Biologia, Universidade Estadual Campinas, Campinas, SP, Brazil.

<sup>f</sup> Centro de Pesquisas Químicas, Biológicas e Agrícolas, Universidade Estadual de Campinas, Campinas, SP, Brazil.

<sup>g</sup> Instituto de Química, Universidade Estadual de Campinas, Campinas, SP, Brazil.

#### 1. Selected NMR spectra of Perillyl-Dihydropyrimidinone hybrids

##### 1.1 <sup>1</sup>H NMR of Compounds **8a-8o**

##### 1.2 <sup>13</sup>C NMR of Compounds **8a-8o**

Corresponding authors

E-Mail address: dennis@iq.ufrgs.br

E-Mail address: carvalho@fcb.unicamp.br

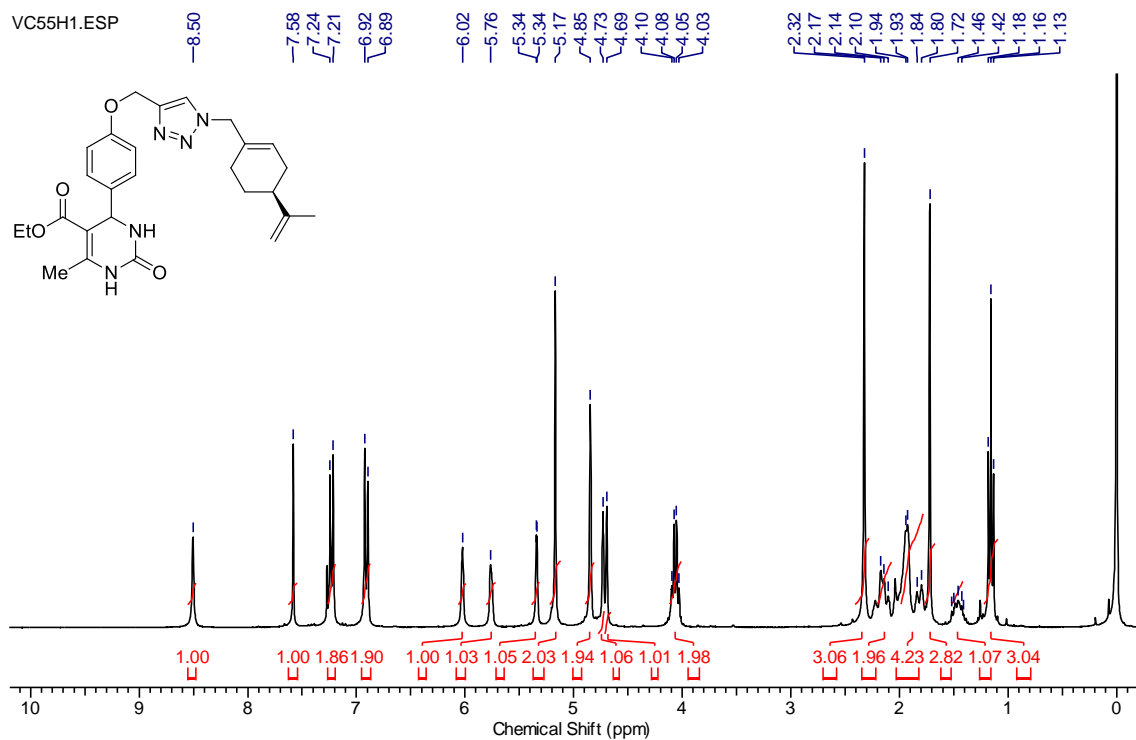

Figure S1.  $^1\text{H}$  NMR (300 MHz,  $\text{CDCl}_3$ ) of compound 8a.

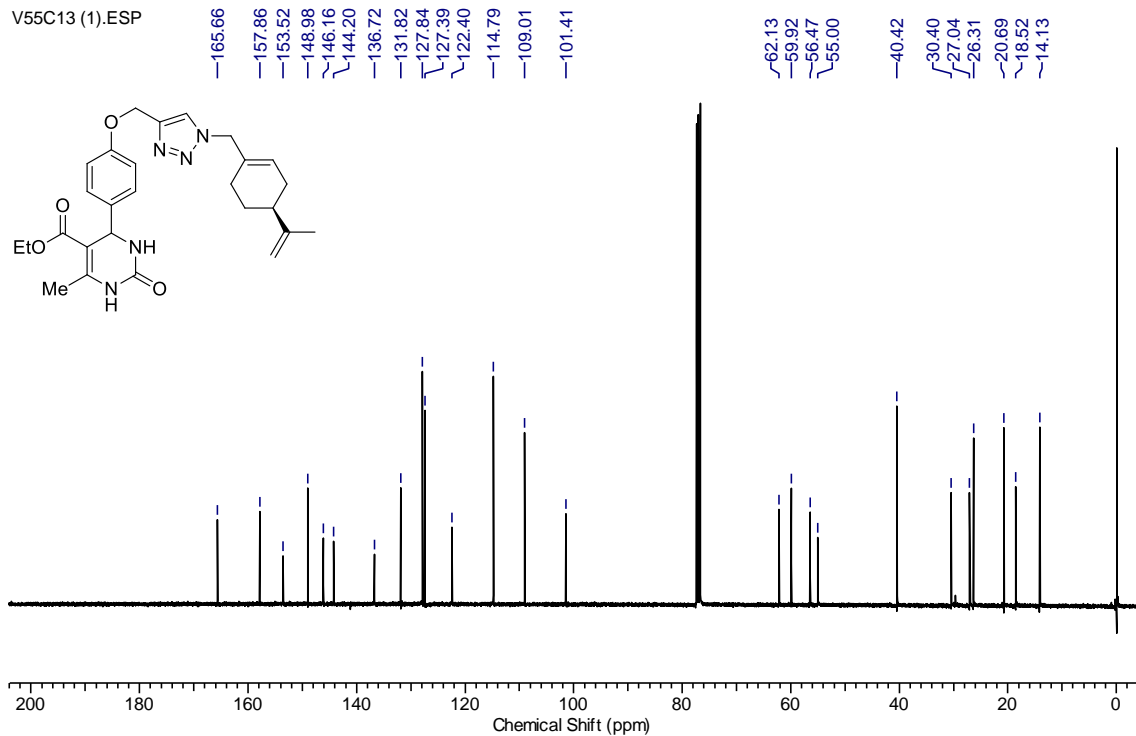

Figure S2.  $^{13}\text{C}$  NMR (75 MHz,  $\text{CDCl}_3$ ) of compound 8a.

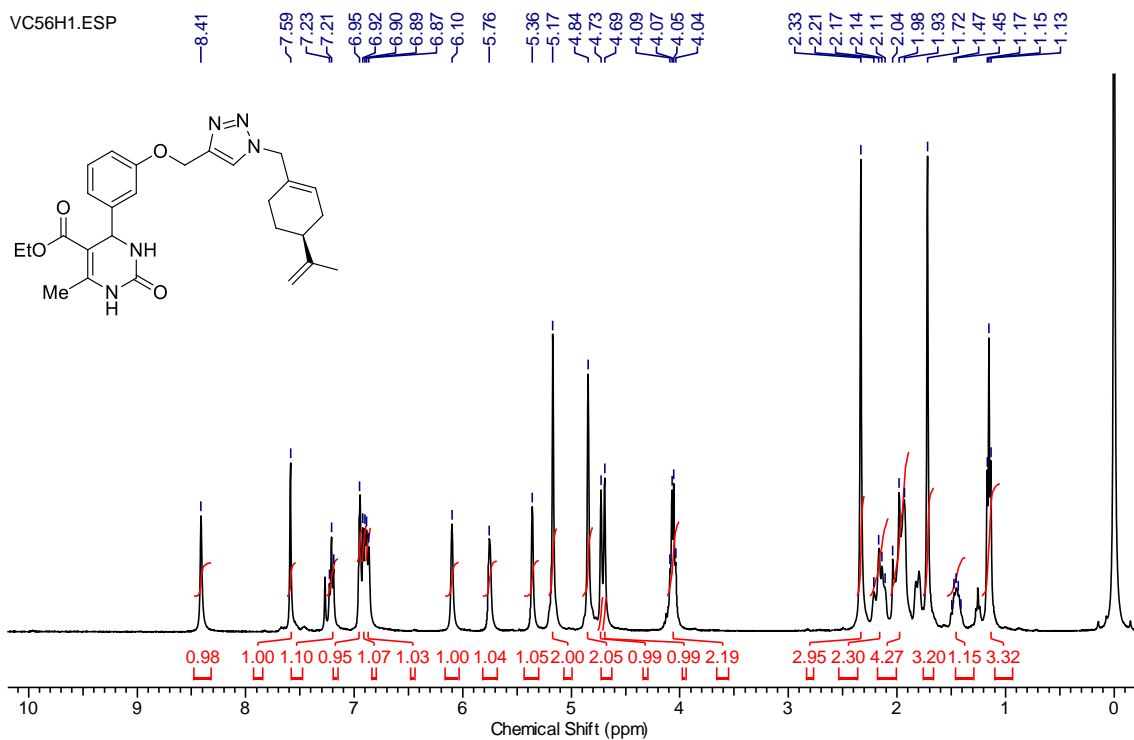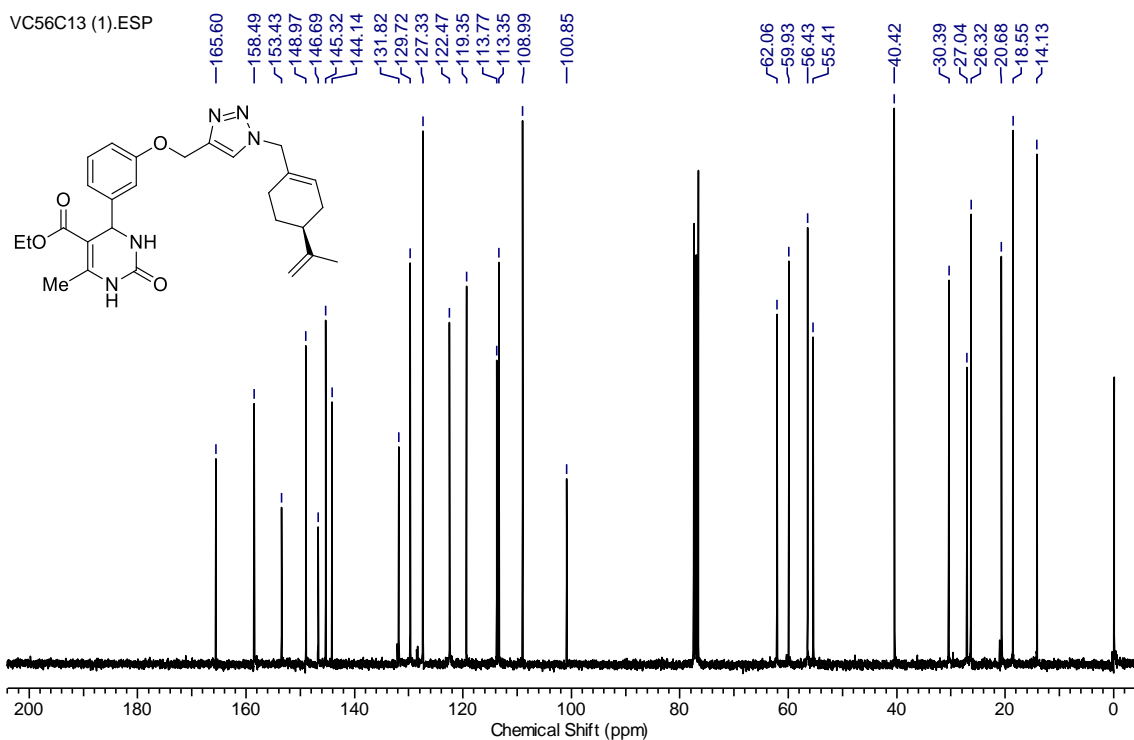

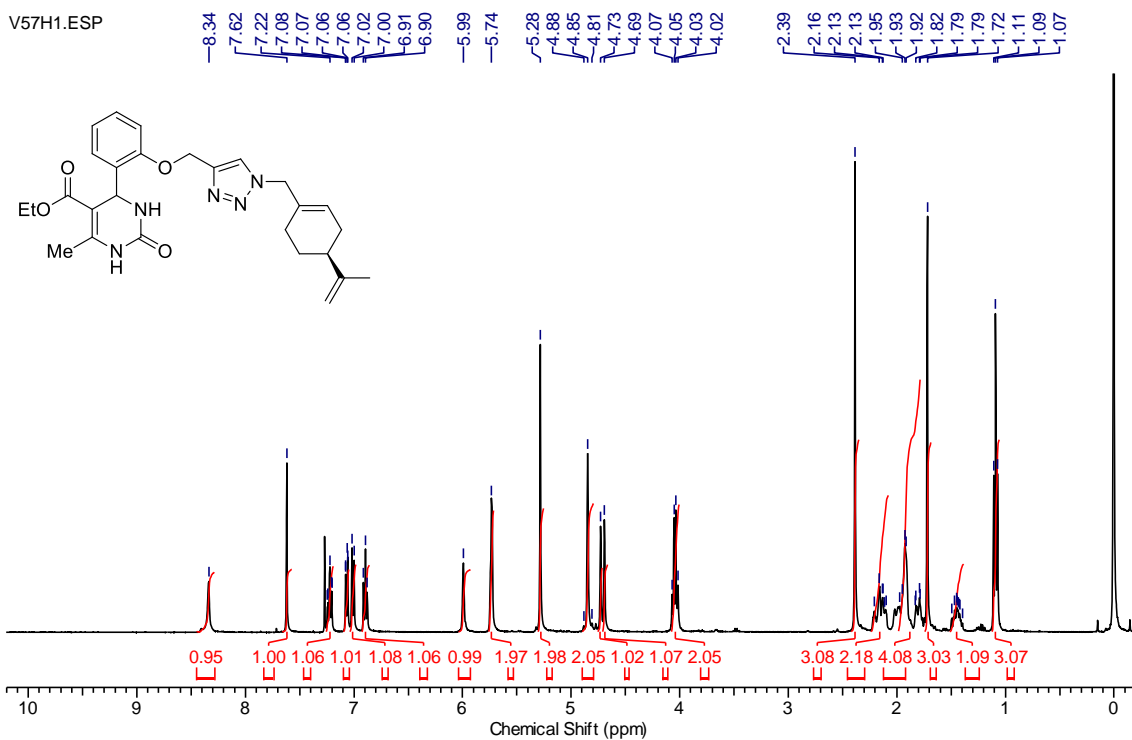

**Figure S5.**  $^1\text{H}$  NMR (400 MHz,  $\text{CDCl}_3$ ) of compound **8c**.

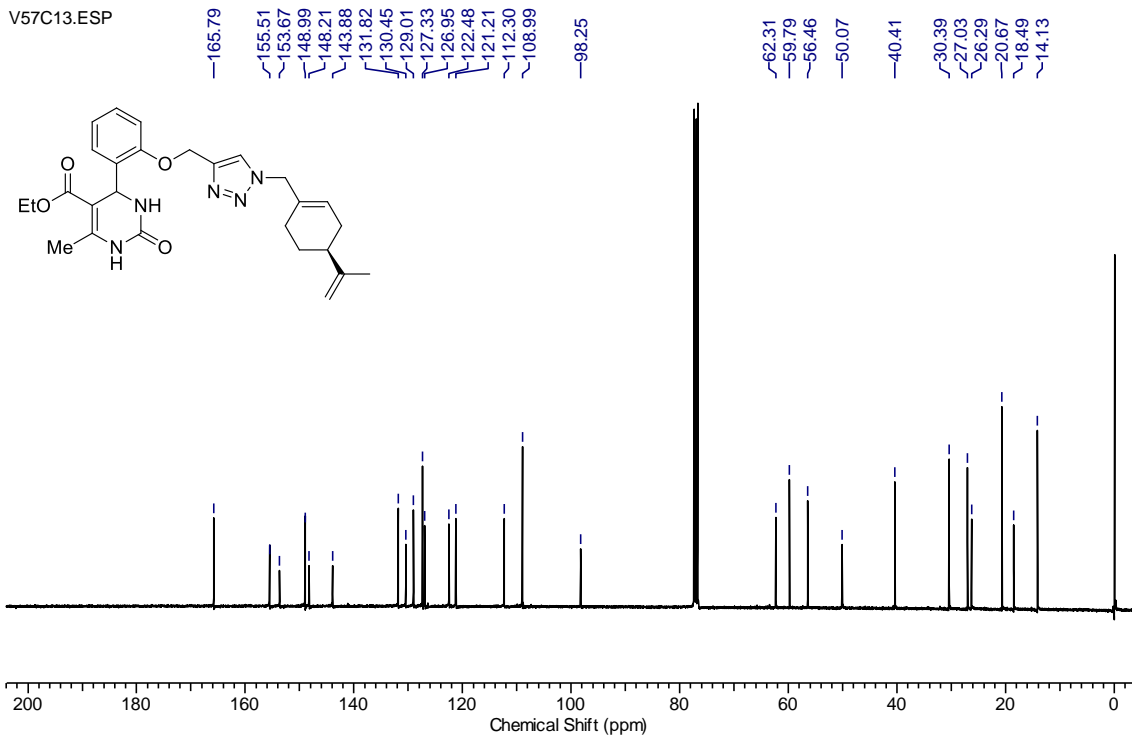

**Figure S6.**  $^{13}\text{C}$  NMR (100 MHz,  $\text{CDCl}_3$ ) of compound **8c**.

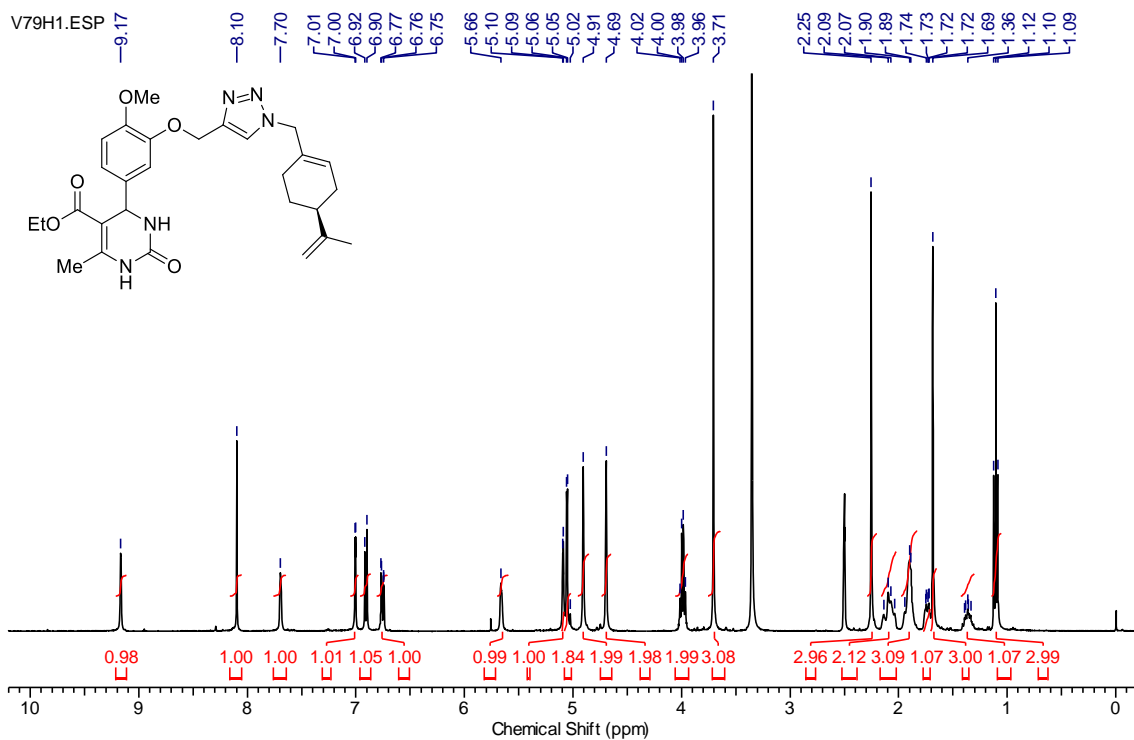

**Figure S7.**  $^1\text{H}$  NMR (400 MHz,  $\text{DMSO-}d_6$ ) of compound **8d**.

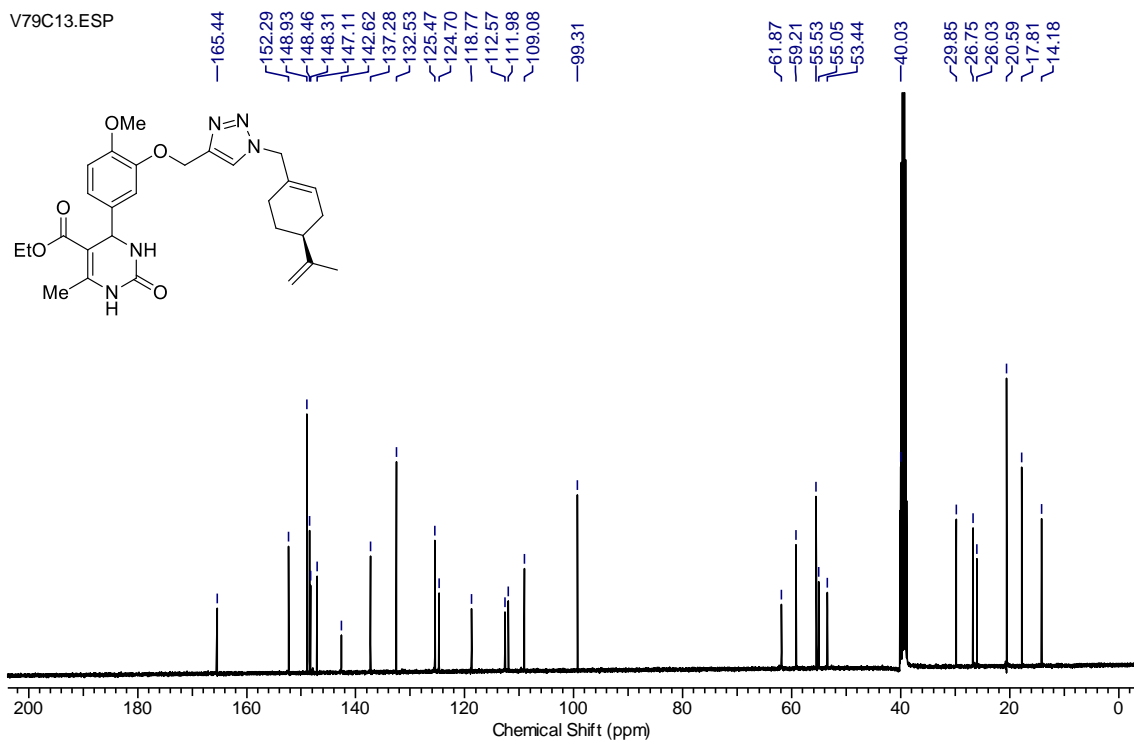

**Figure S8.**  $^{13}\text{C}$  NMR (100 MHz,  $\text{DMSO-}d_6$ ) of compound **8d**.

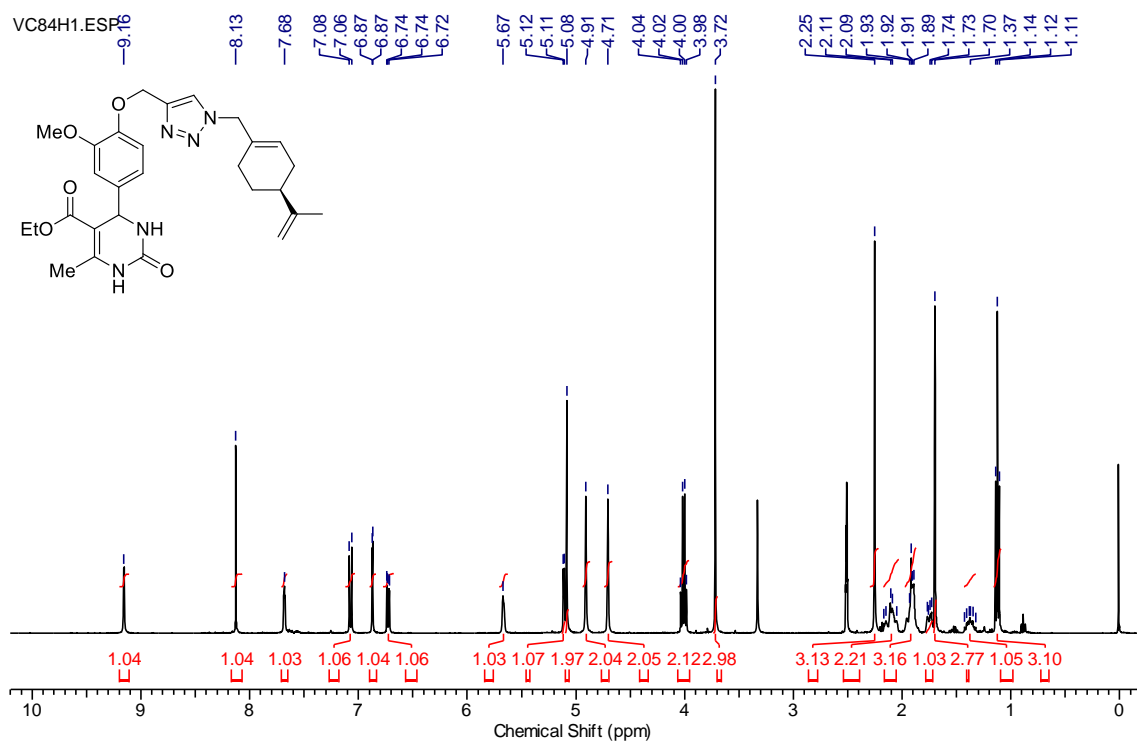

**Figure S9.**  $^1\text{H}$  NMR (400 MHz,  $\text{DMSO-}d_6$ ) of compound **8e**.

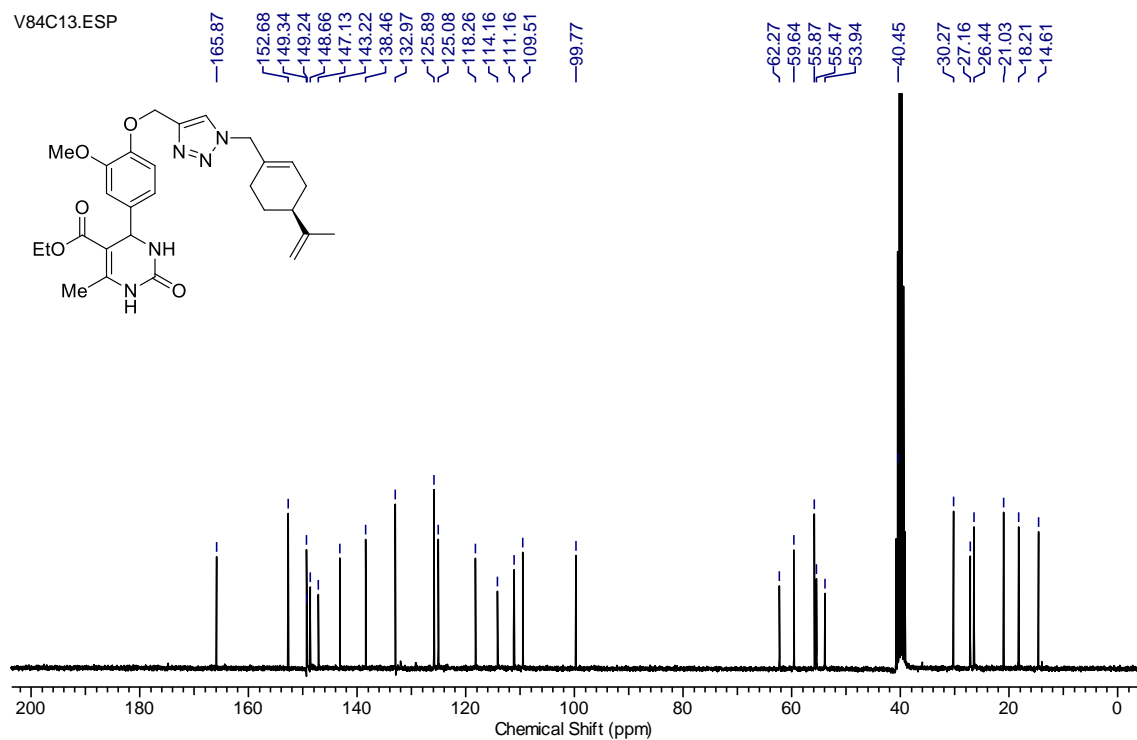

**Figure S10.**  $^{13}\text{C}$  NMR (100 MHz,  $\text{DMSO-}d_6$ ) of compound **8e**.

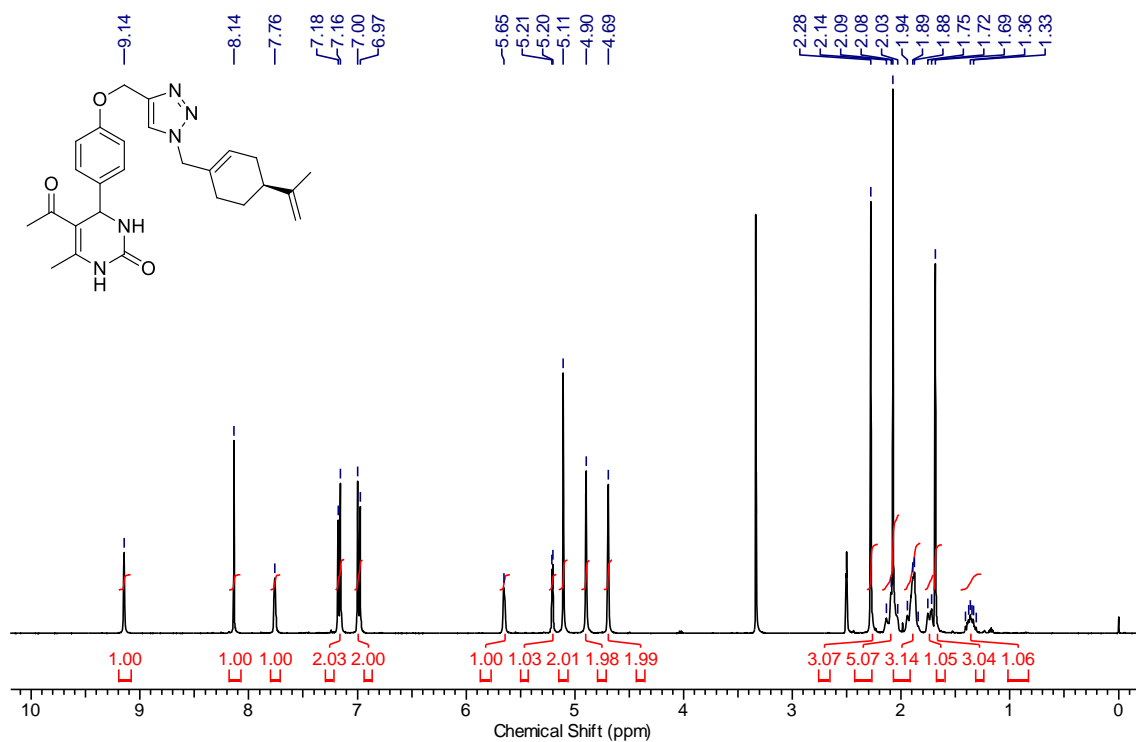

Figure S11. <sup>1</sup>H NMR (400 MHz, DMSO-*d*<sub>6</sub>) of compound 8f.

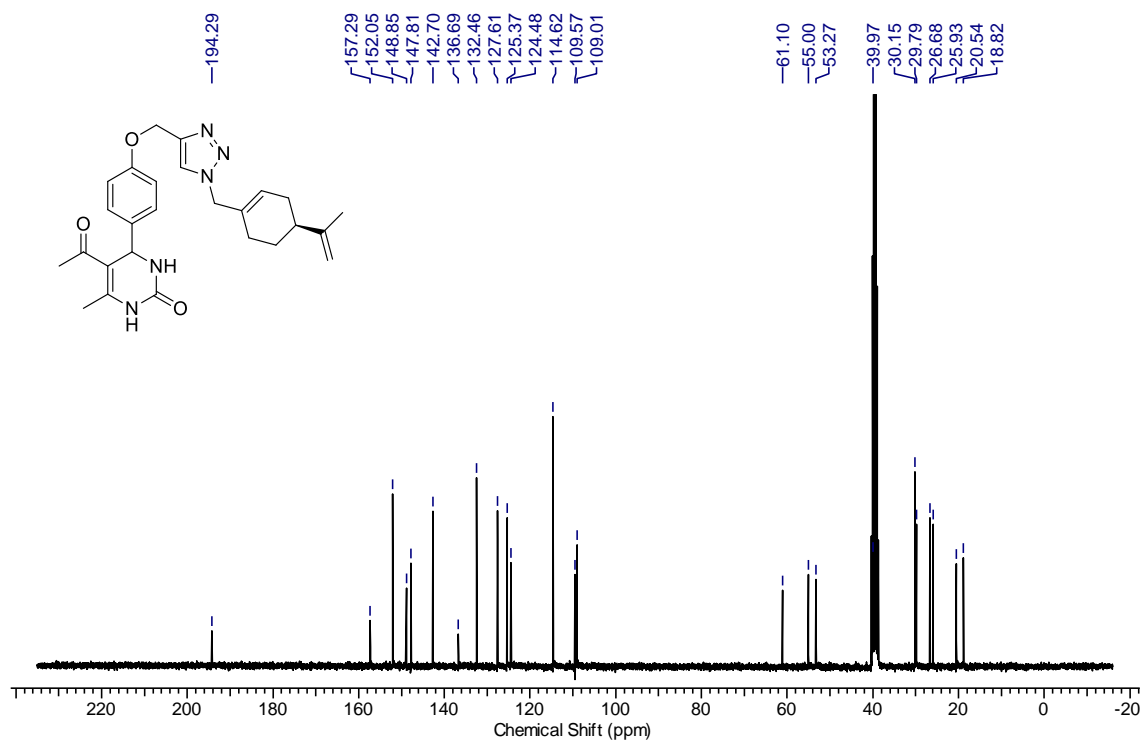

Figure S12. <sup>13</sup>C NMR (100 MHz, DMSO-*d*<sub>6</sub>) of compound 8f.

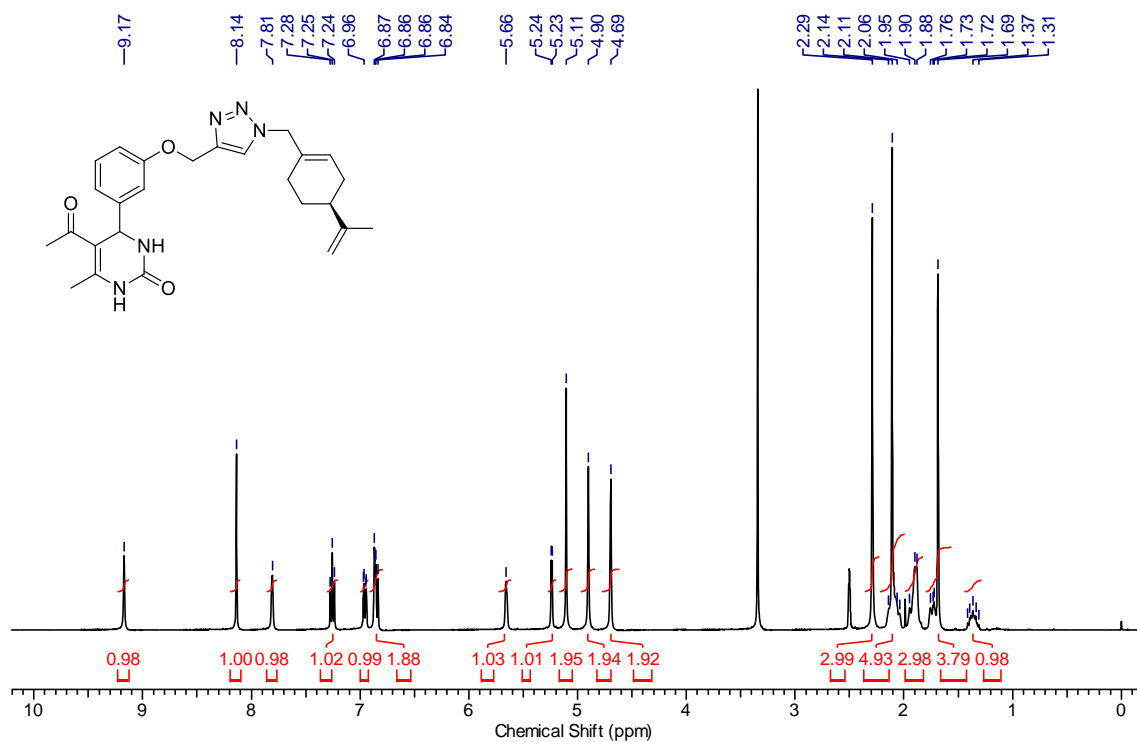

Figure S13. <sup>1</sup>H NMR (400 MHz, DMSO-*d*<sub>6</sub>) of compound 8g.

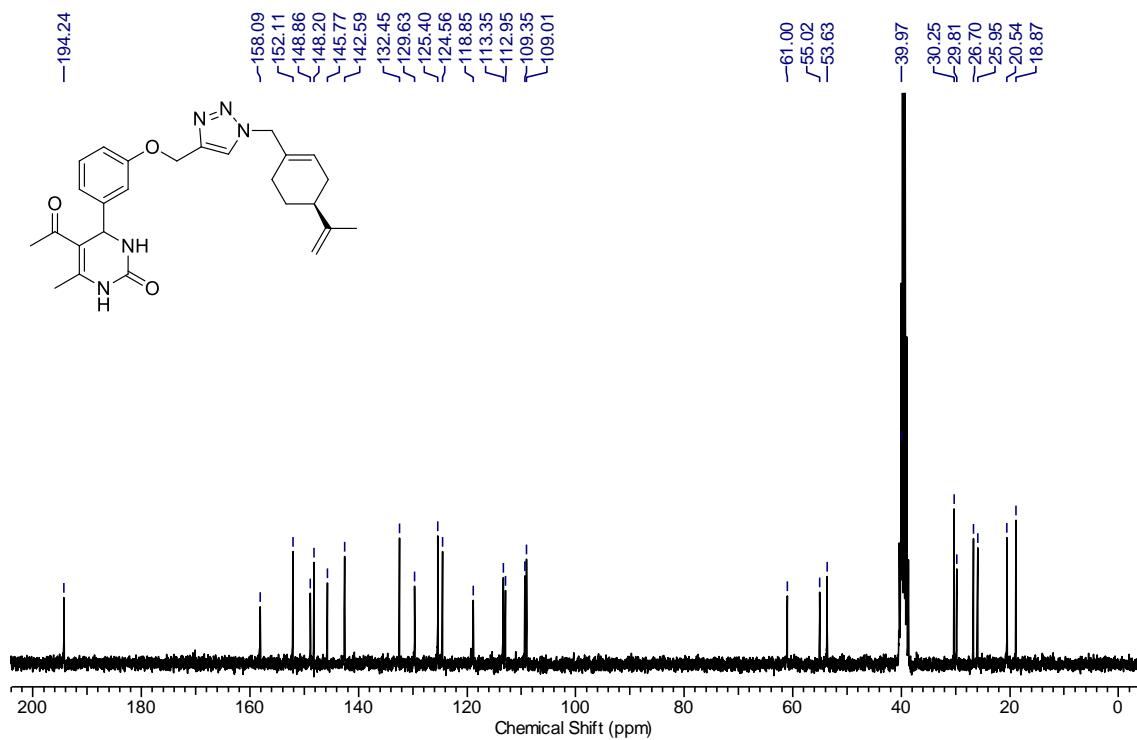

Figure S14. <sup>13</sup>C NMR (100 MHz, DMSO-*d*<sub>6</sub>) of compound 8g.



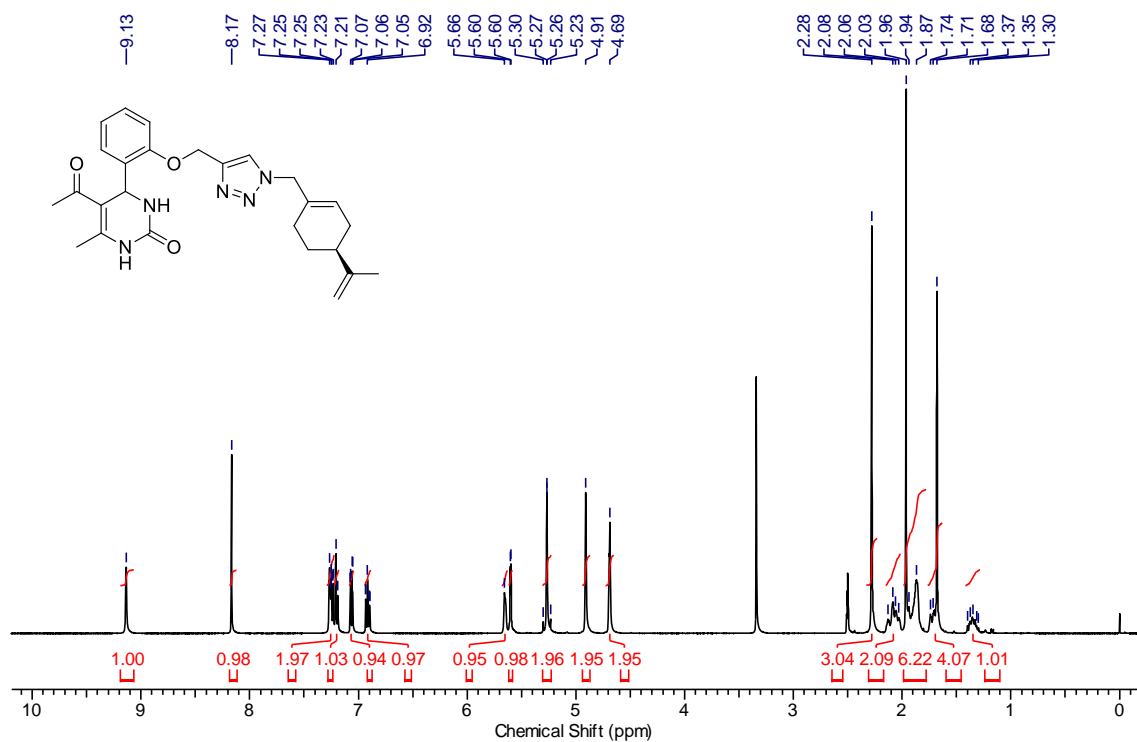

**Figure S15.** <sup>1</sup>H NMR (400 MHz, DMSO-*d*<sub>6</sub>) of compound 8h.

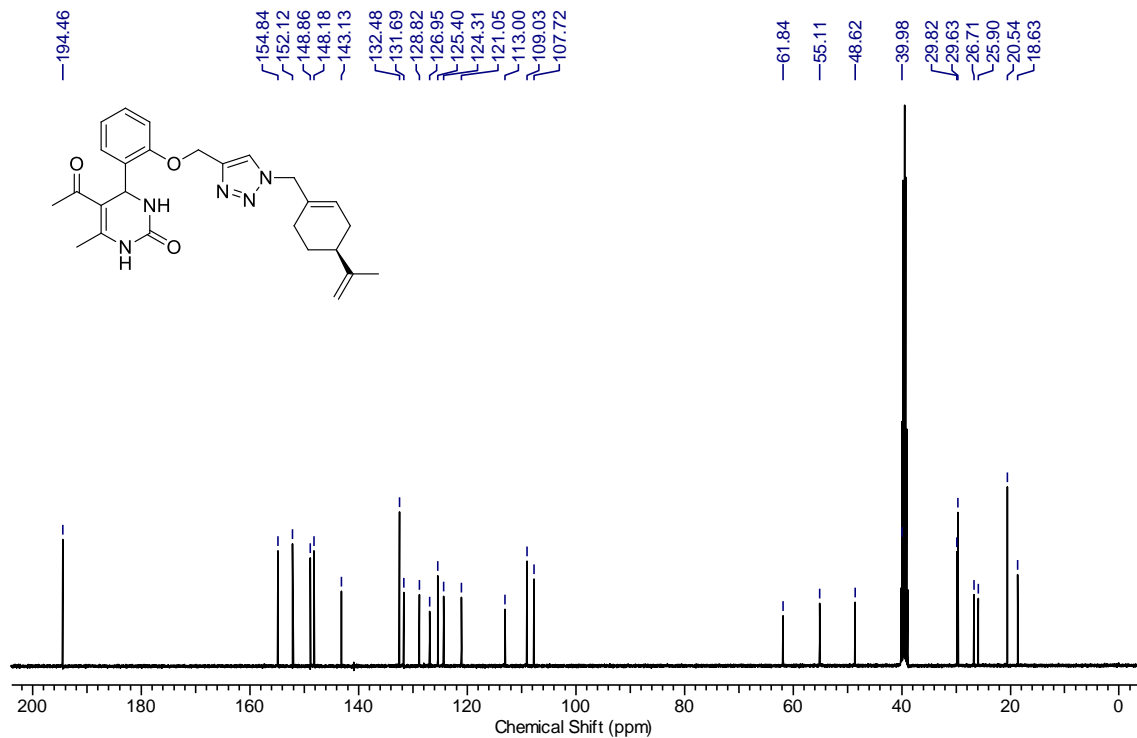

**Figure S16.** <sup>13</sup>C NMR (100 MHz, DMSO-*d*<sub>6</sub>) of compound 8h.

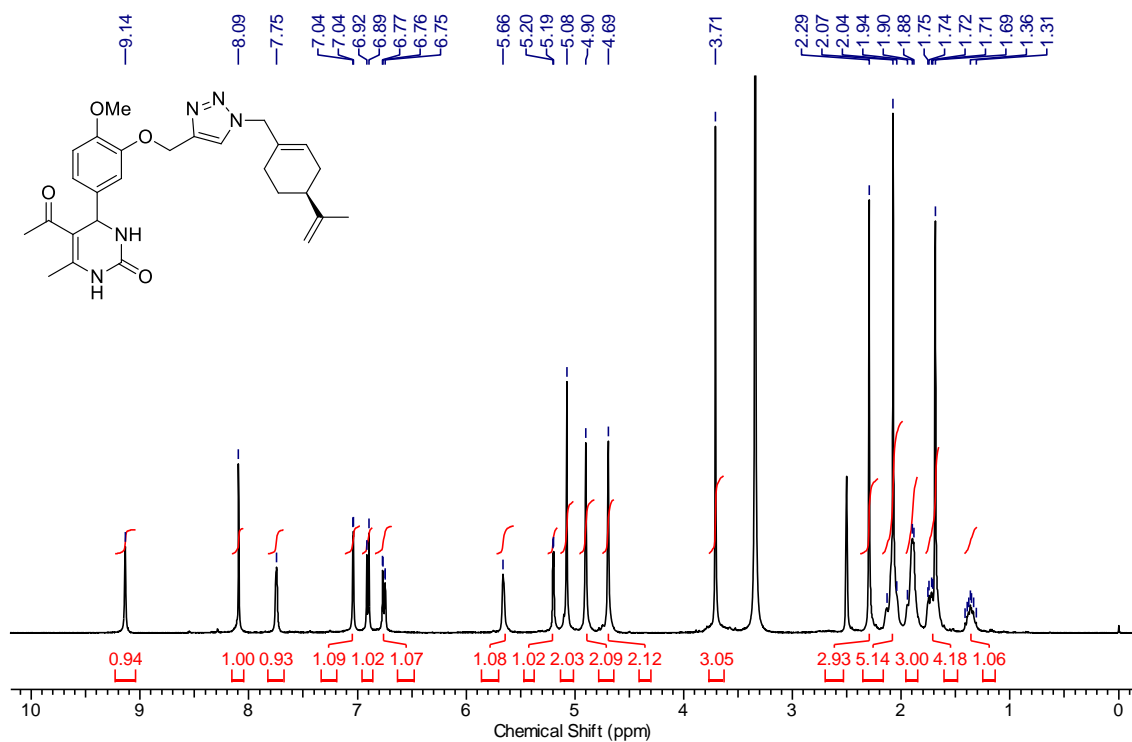

Figure S17. <sup>1</sup>H NMR (400 MHz, DMSO-*d*<sub>6</sub>) of compound 8i.

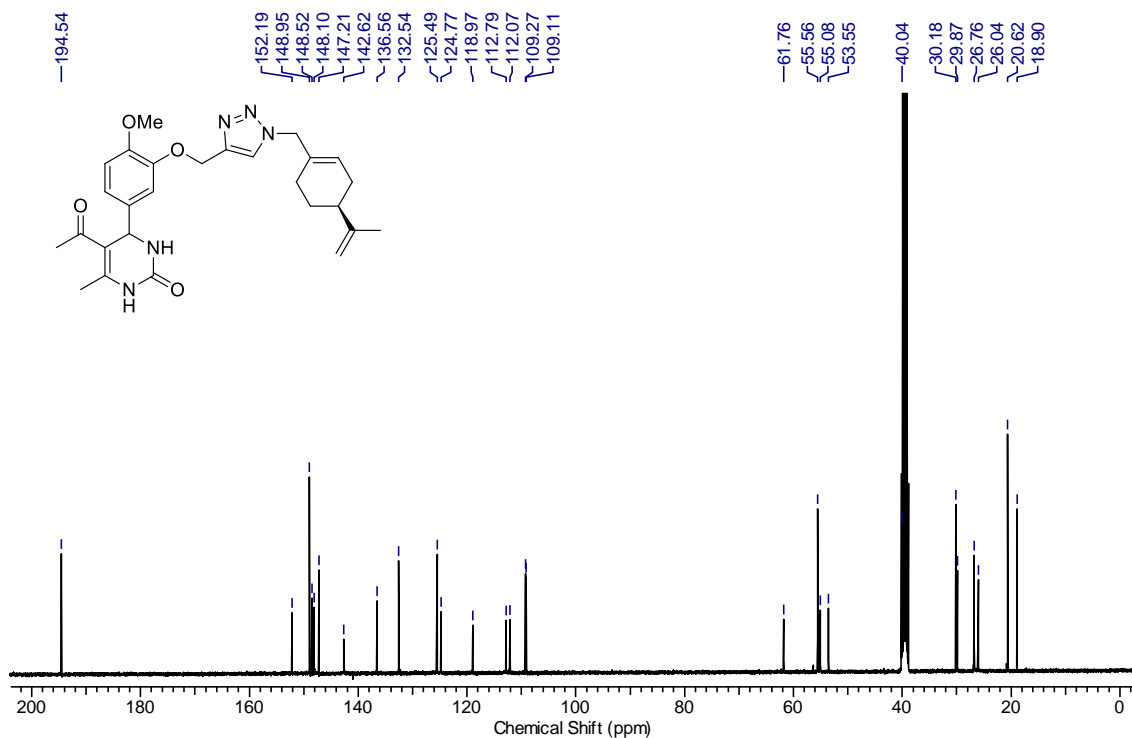

Figure S18. <sup>13</sup>C NMR (100 MHz, DMSO-*d*<sub>6</sub>) of compound 8i.

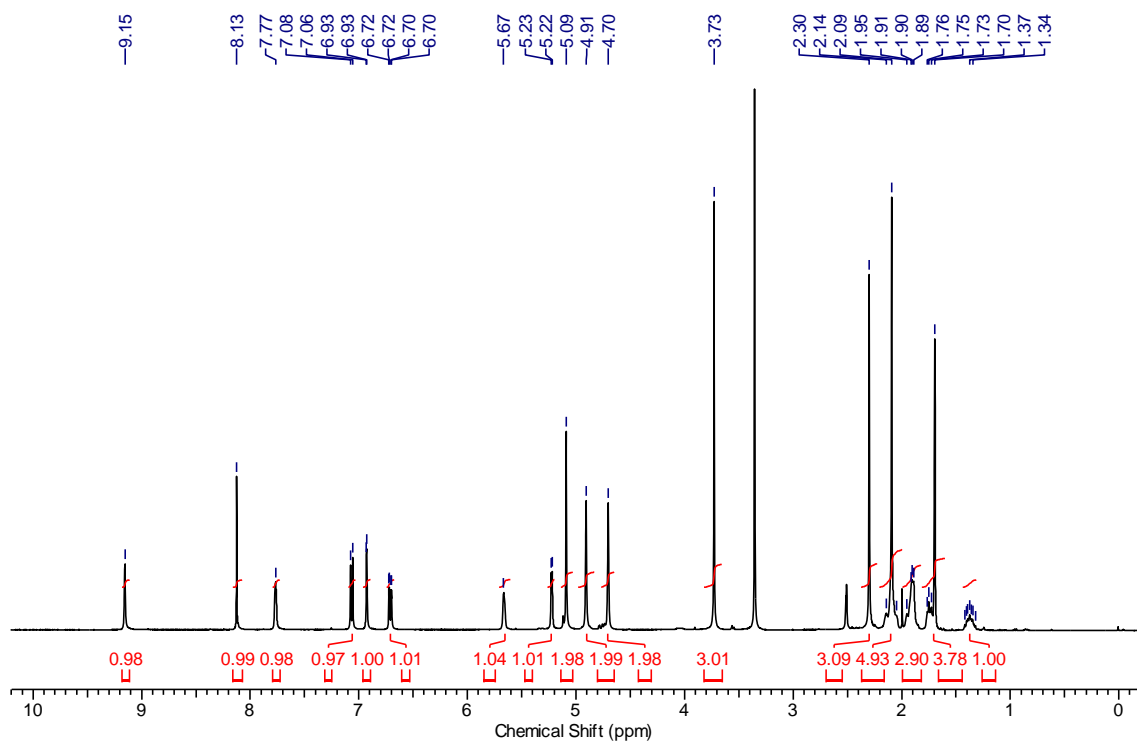

Figure S19.  $^1\text{H}$  NMR (400 MHz,  $\text{DMSO-}d_6$ ) of compound **8j**.

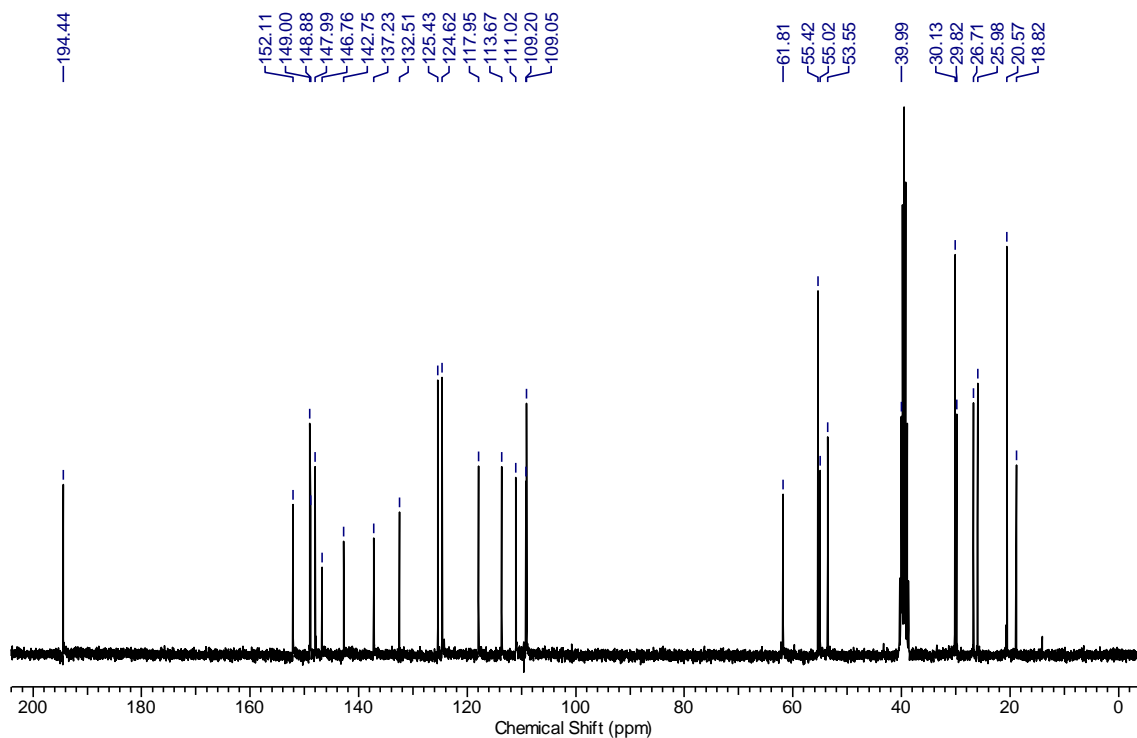

Figure S20.  $^{13}\text{C}$  NMR (100 MHz,  $\text{DMSO-}d_6$ ) of compound **8j**.

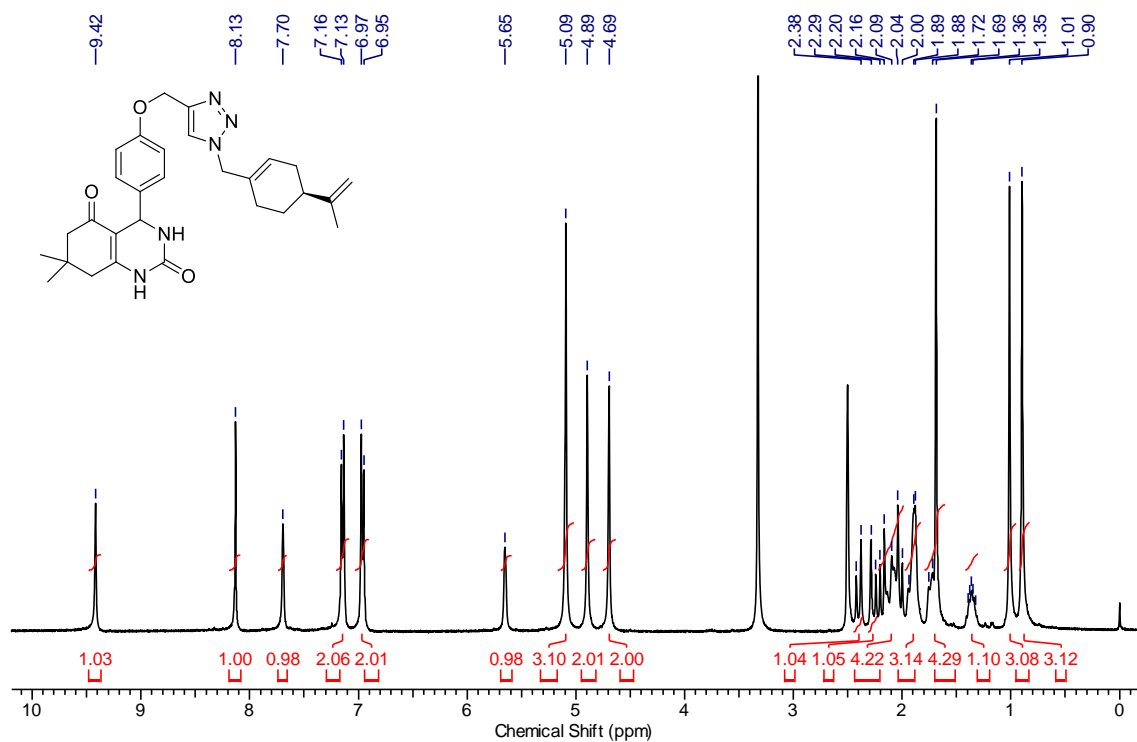

Figure S21. <sup>1</sup>H NMR (400 MHz, DMSO-*d*<sub>6</sub>) of compound 8k.

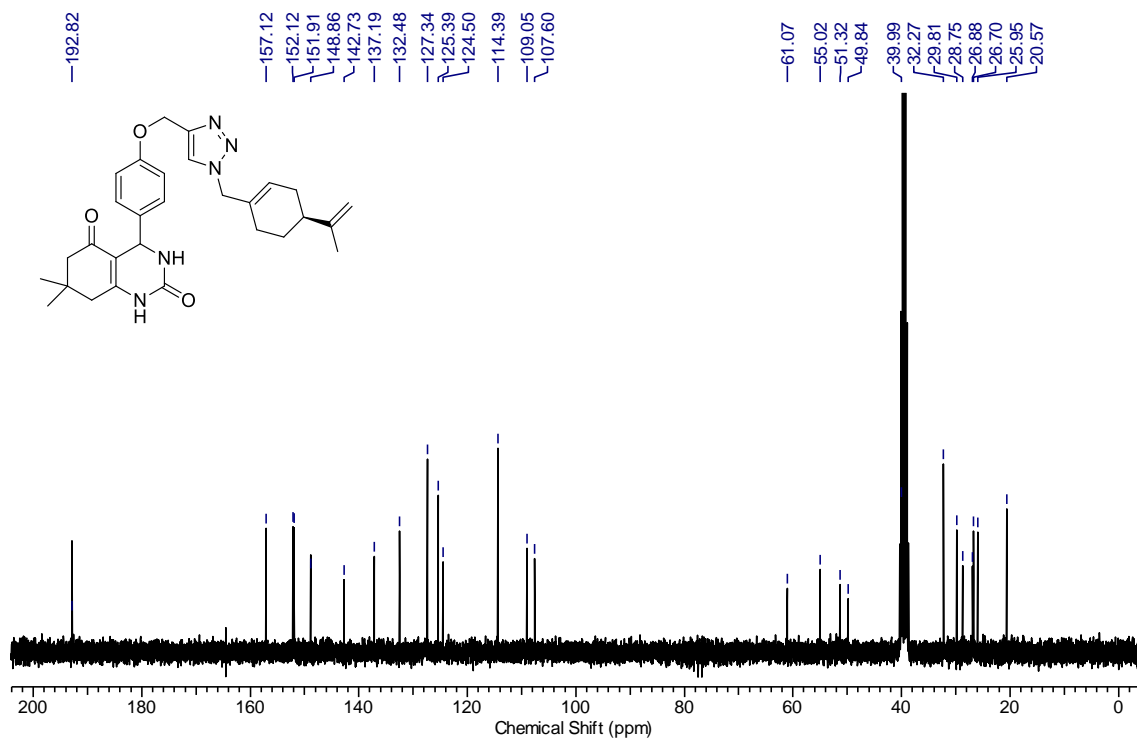

Figure S22. <sup>13</sup>C NMR (100 MHz, DMSO-*d*<sub>6</sub>) of compound 8k.

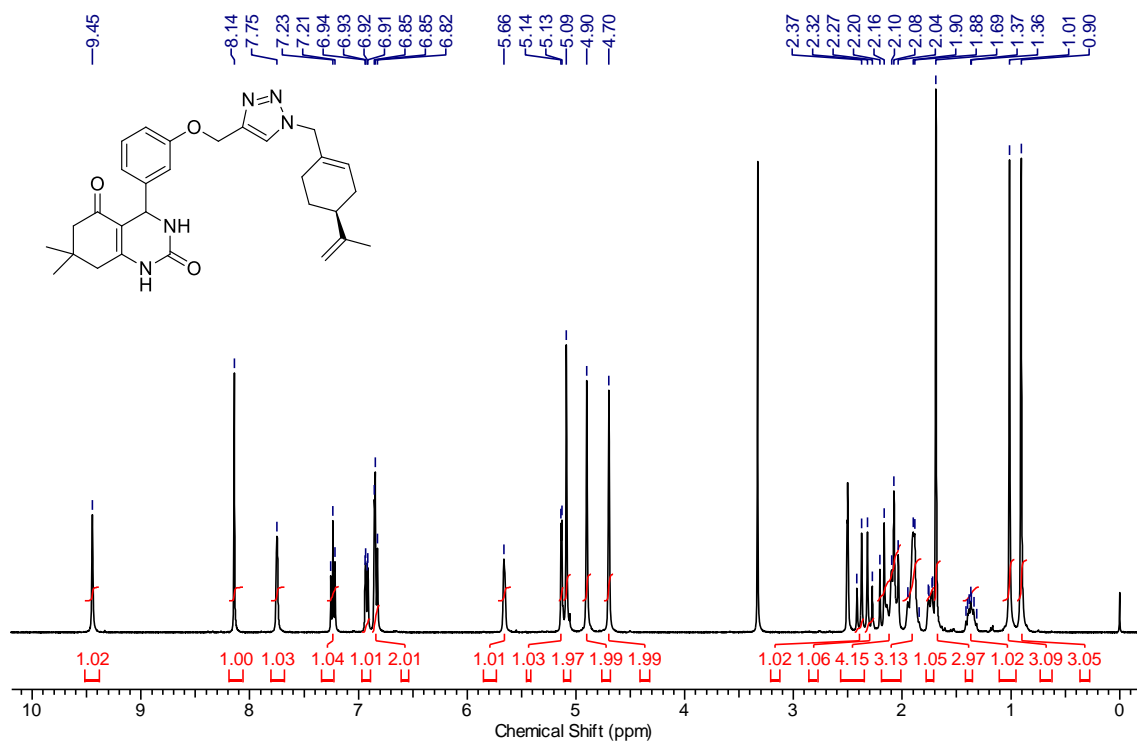

Figure S23. <sup>1</sup>H NMR (400 MHz, DMSO-*d*<sub>6</sub>) of compound 8I.

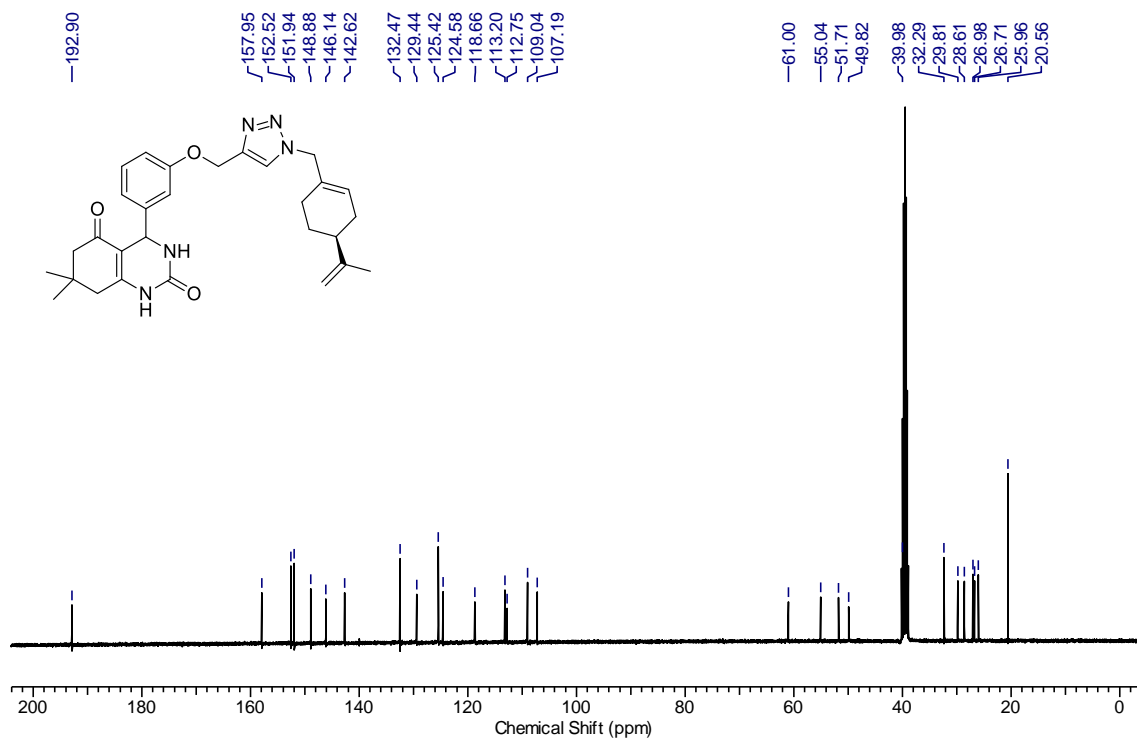

Figure S24. <sup>13</sup>C NMR (100 MHz, DMSO-*d*<sub>6</sub>) of compound 8I.

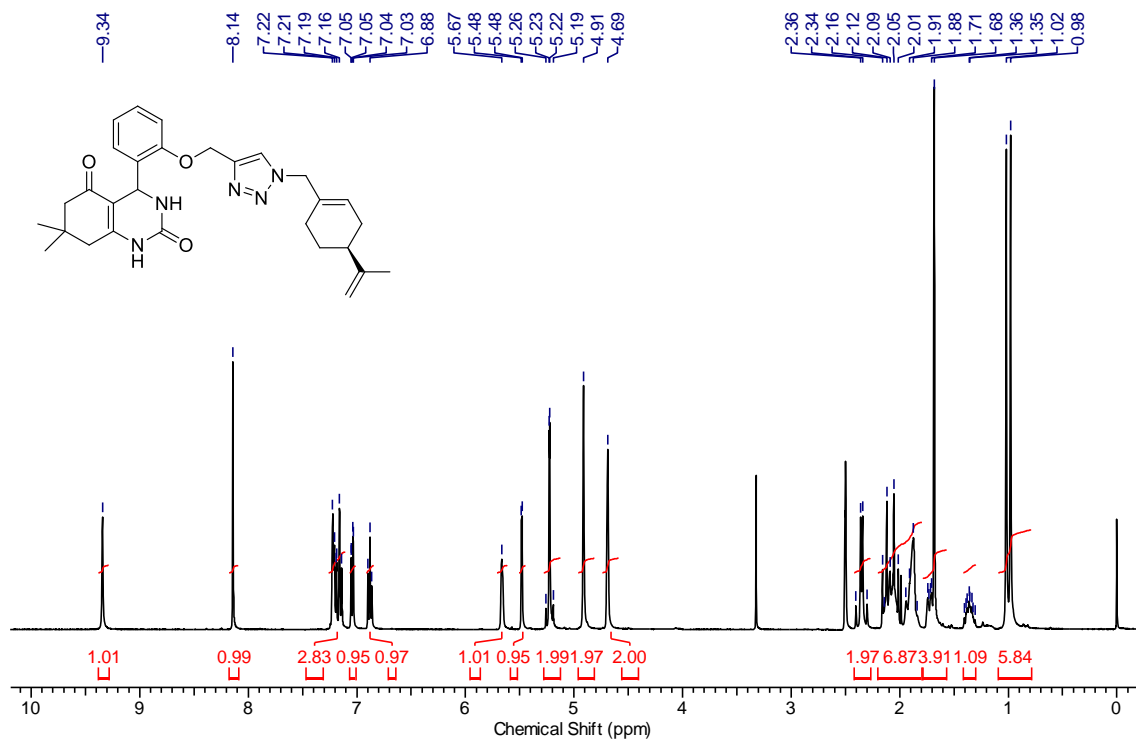

Figure S25. <sup>1</sup>H NMR (400 MHz, DMSO-*d*<sub>6</sub>) of compound 8m.

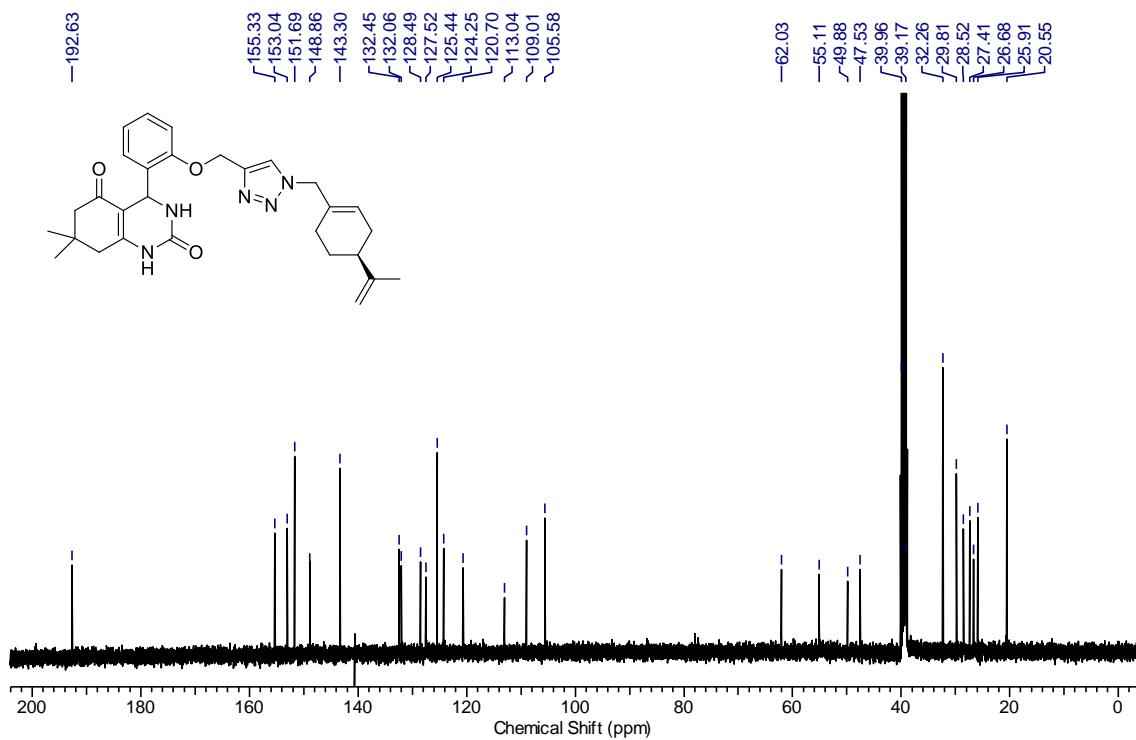

Figure S26. <sup>13</sup>C NMR (100 MHz, DMSO-*d*<sub>6</sub>) of compound 8m.

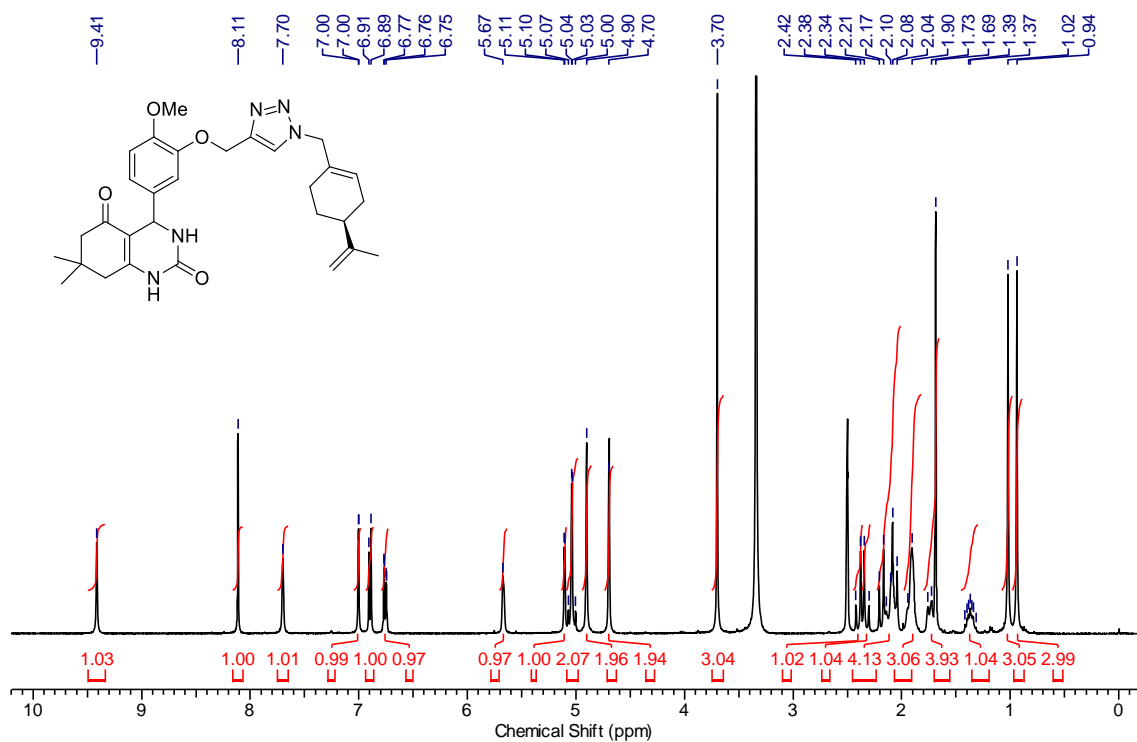

Figure S27. <sup>1</sup>H NMR (400 MHz, DMSO-*d*<sub>6</sub>) of compound 8n.

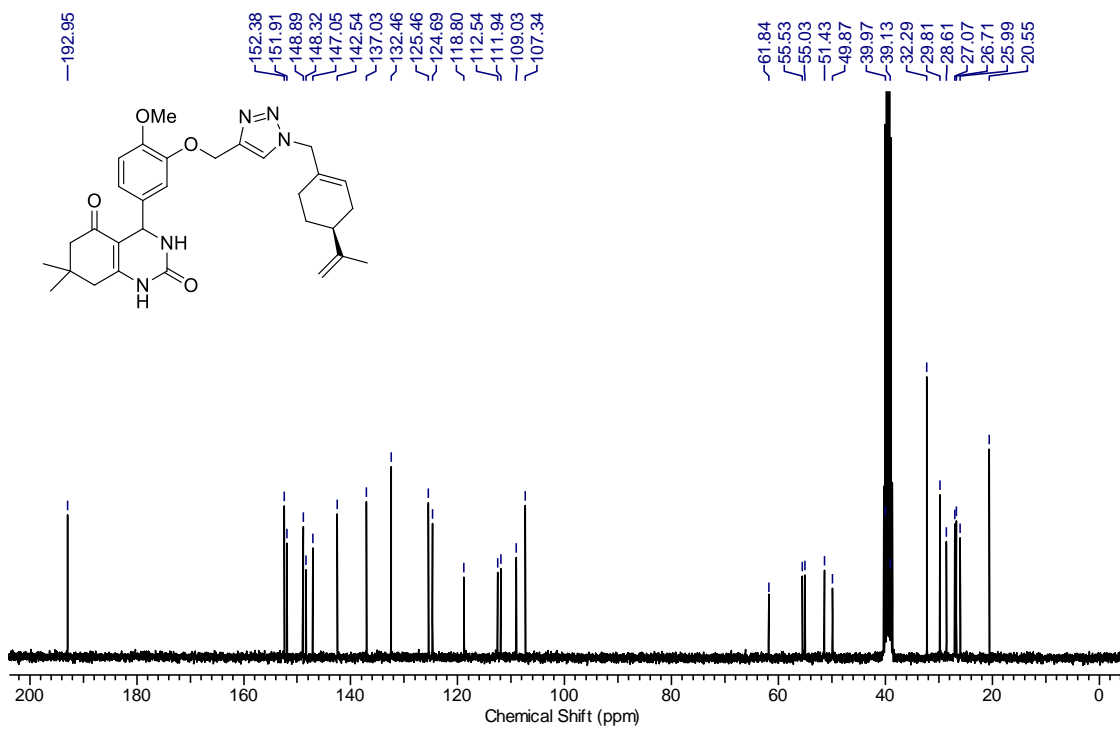

Figure S28. <sup>13</sup>C NMR (100 MHz, DMSO-*d*<sub>6</sub>) of compound 8n.

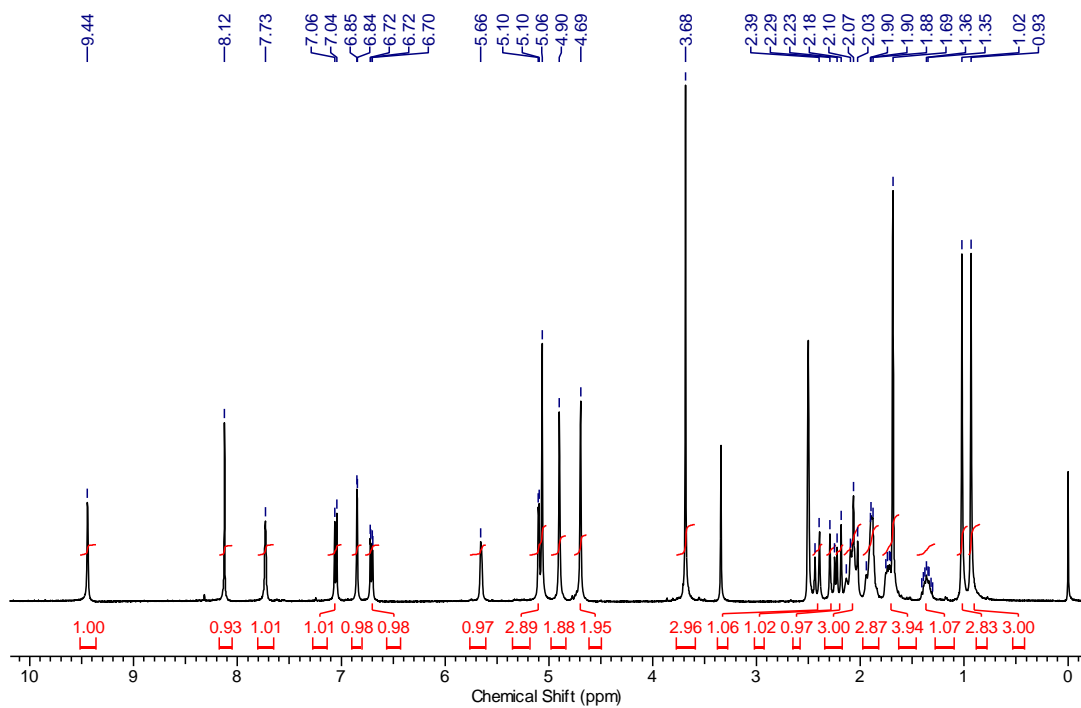

Figure S29.  $^1\text{H}$  NMR (400 MHz,  $\text{DMSO-}d_6$ ) of compound **8o**.

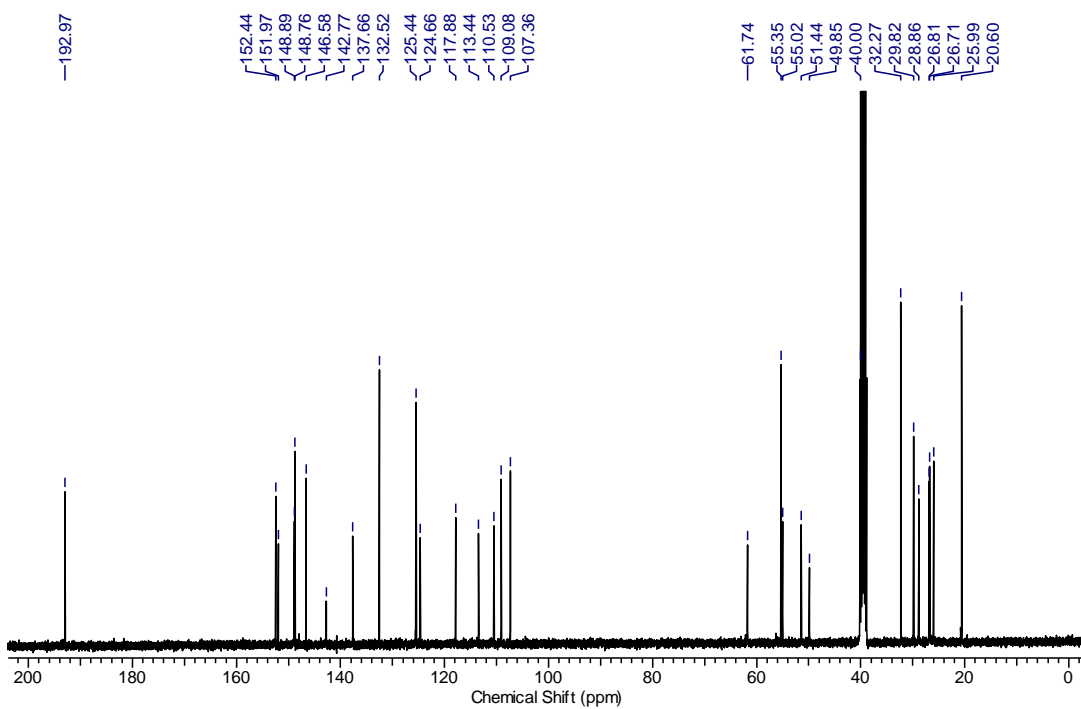

Figure S30.  $^{13}\text{C}$  NMR (100 MHz,  $\text{DMSO-}d_6$ ) of compound **8o**.
